# Supplementary material for: Mapping gaseous dimethylamine, trimethylamine, ammonia, and their particulate counterparts in marine atmospheres of China’s marginal seas – Part 2: Spatiotemporal heterogeneity, causes, and hypothesis
Source: Copernicus journal article supplement (doi:10.5194/acp-22-1515-2022), 2022-02-01
Supplement: Supplementary file 1 [file acp-22-1515-2022-supplement.pdf]

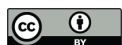

*Supplement of*

**Mapping gaseous dimethylamine, trimethylamine, ammonia, and their particulate counterparts in marine atmospheres of China's marginal seas – Part 2: Spatiotemporal heterogeneity, causes, and hypothesis**

**Yating Gao et al.**

*Correspondence to:* Xiaohong Yao (xhyao@ouc.edu.cn)

The copyright of individual parts of the supplement might differ from the article licence.

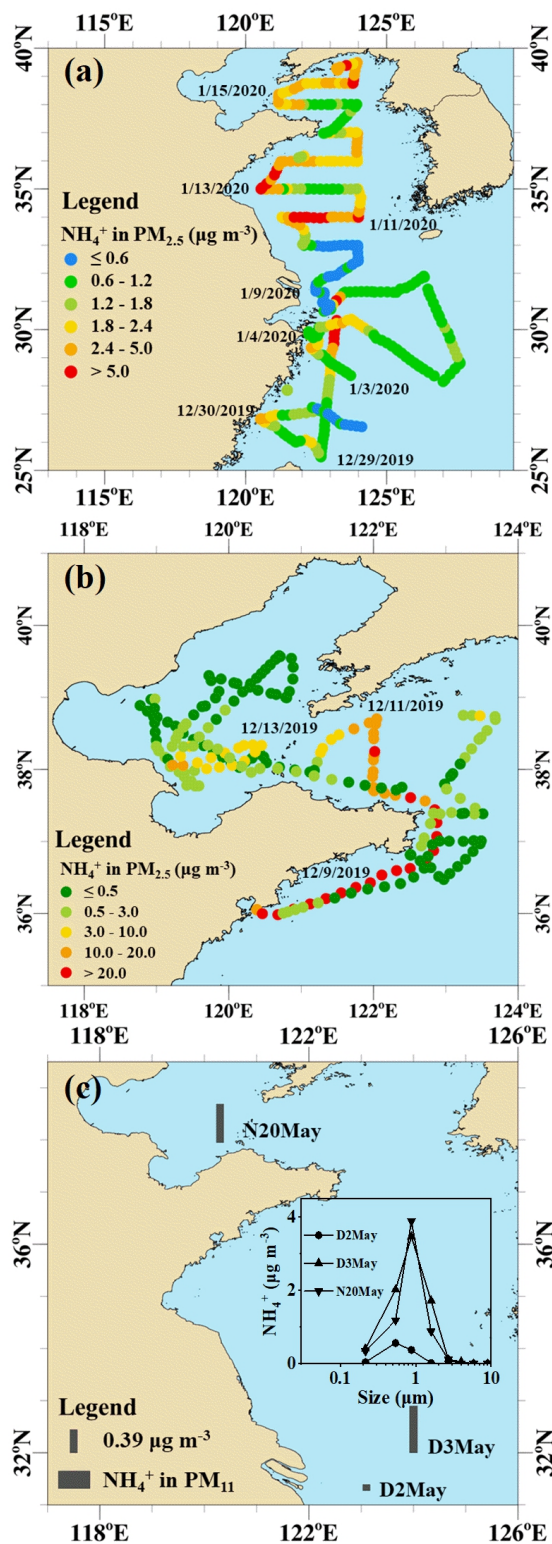

Figure S1: Map of particulate  $\text{NH}_4^+$  in marine atmospheres during three campaigns: (a) Campaign B, (b) Campaign A, and (c) Campaign C, size distributions of particulate  $\text{NH}_4^+$  was superimposed in (c). D2May, D3May, N20May represent samples collected in the daytime on May 2 and 3, 2012, and in the nighttime on May 20, 2012, respectively.

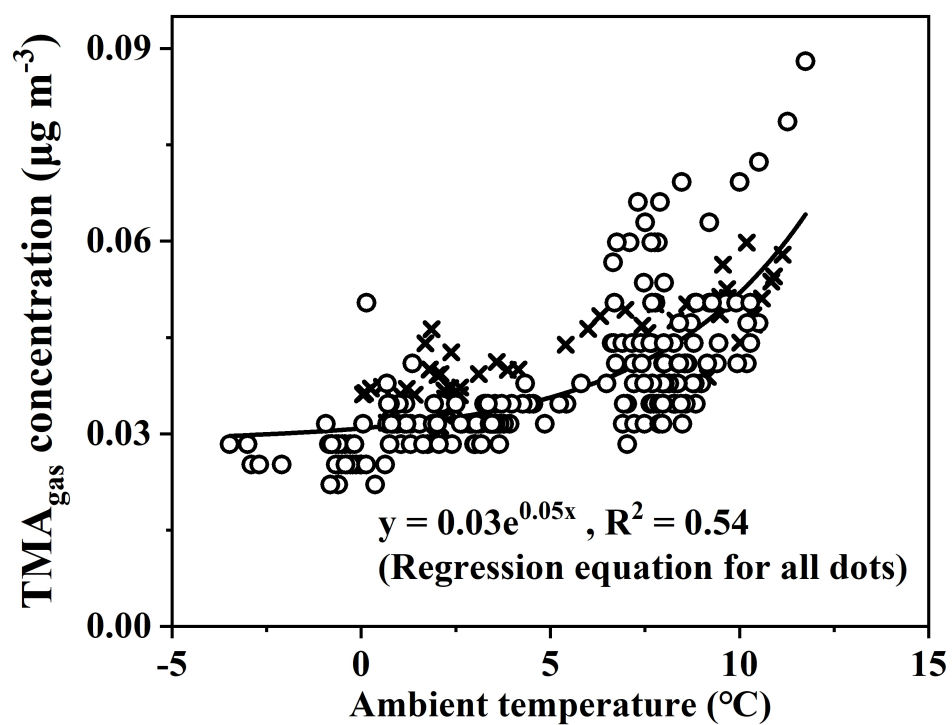

Figure S2: Correlation of TMA<sub>gas</sub> with ambient temperature (open circle and cross represent data collected in Campaign B and a particular period of Campaign A, respectively).

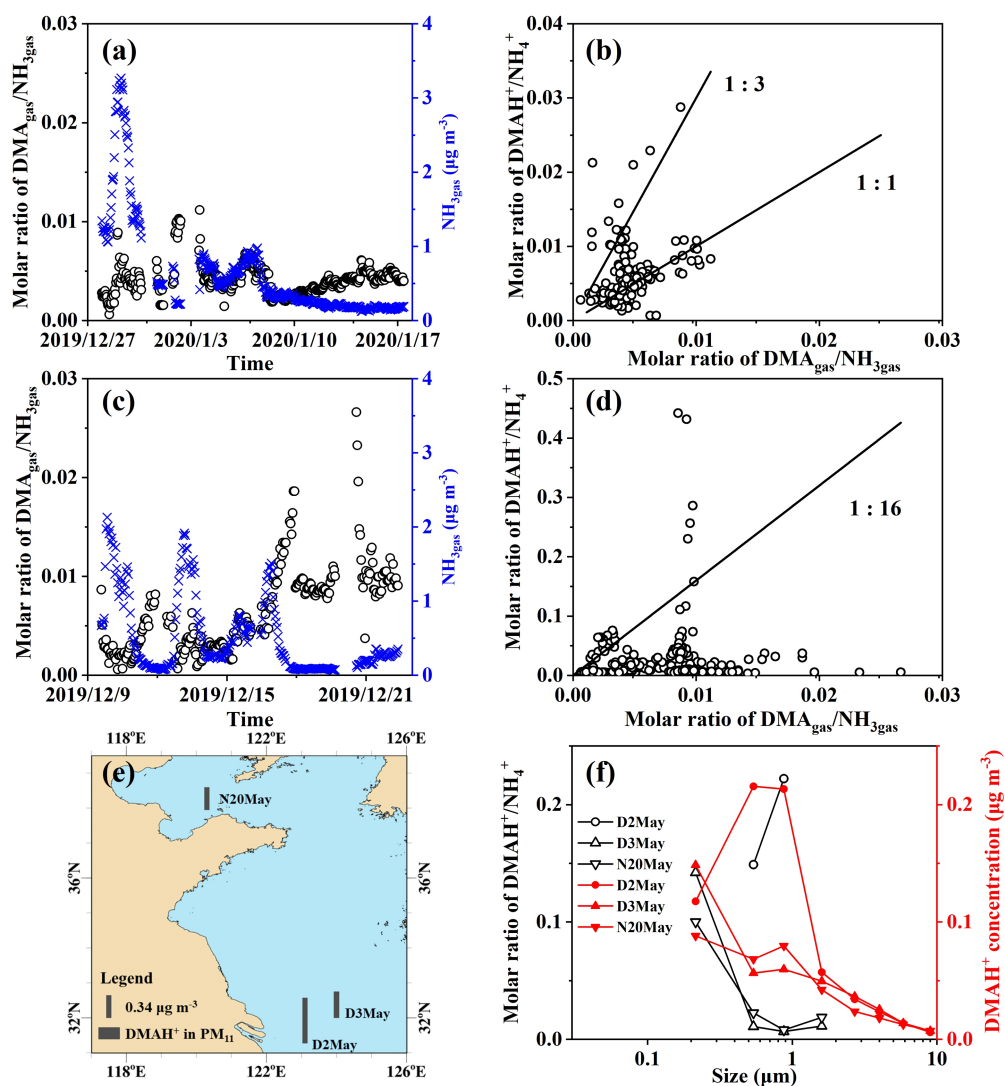

Figure S3: Time series of molar ratios of DMA<sub>gas</sub>/NH<sub>3gas</sub> (a) and (c) in Campaign B and A; correlation between DMA<sub>gas</sub>/NH<sub>3gas</sub> and DMAH<sup>+</sup>/NH<sub>4</sub><sup>+</sup> (b) and (d) in Campaign B and A; map of particulate DMAH<sup>+</sup>; (e) and size distributions of DMAH<sup>+</sup>/NH<sub>4</sub><sup>+</sup> and mass concentrations of DMAH<sup>+</sup>; (f) in Campaign C.

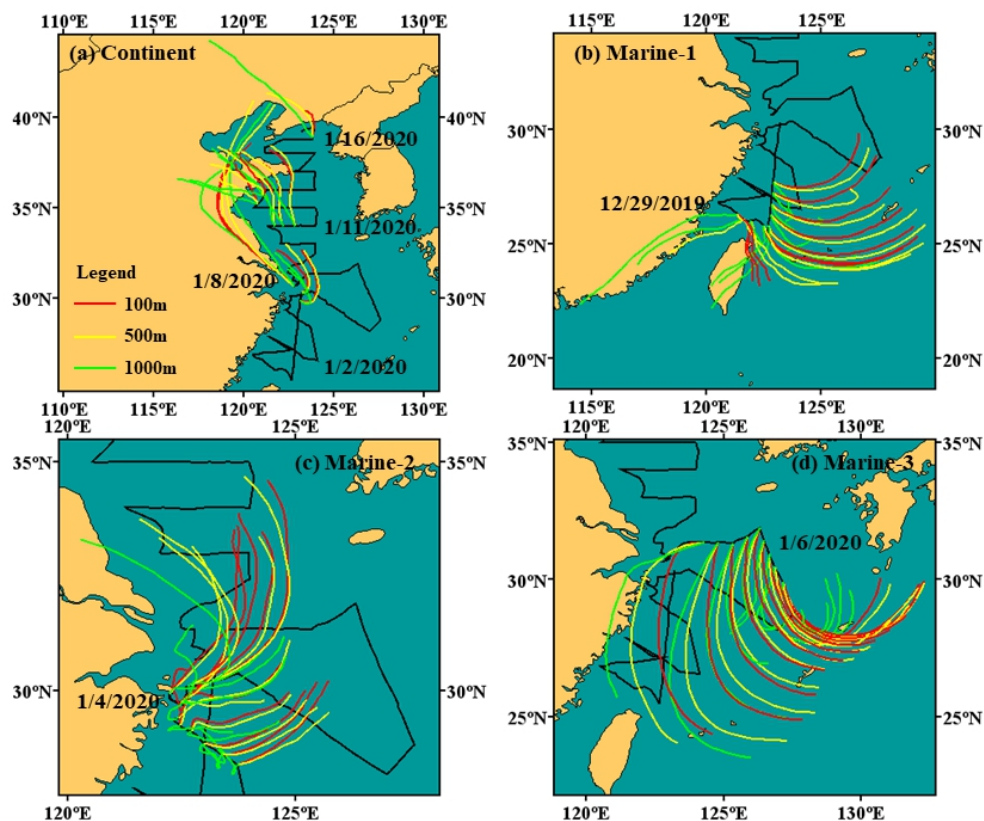

Figure S4: The 24-hr air mass backward trajectories at 100m, 500m, and 1000m above sea level during Campaign B corresponding to the samples (a) when the concentration of  $\text{NH}_4^+$  exceeded  $5 \mu\text{g m}^{-3}$ , (b) during Peak<sub>TMAH</sub>-1, (c) during Peak<sub>TMAH</sub>-2, and (d) during Peak<sub>TMAH</sub>-3. The black solid lines represent the campaign cruises.

#### Equations S1-4

$$K_H(DMA) = a_{DMA}/p_{DMA} = m_{DMA} \cdot \gamma_{DMA}/p_{DMA} \quad (S1)$$

$$35 \quad K_b(DMA) = (a_{DMAH^+} \cdot a_{OH^-}) / (a_{DMA} \cdot a_{H_2O})$$

$$= (m_{DMAH^+} \cdot m_{OH^-} / m_{DMA}) \times (\gamma_{DMAH^+} \gamma_{OH^-} / (\gamma_{DMA} \cdot a_{H_2O})) \quad (S2)$$

$$m_{DMA(eff.)} = m_{DMA} + m_{DMAH^+} = p_{DMA} \cdot K_H(DMA) \cdot [1 + K_b(DMA)/m_{OH^-}] \quad (S3)$$

$$^{(eff.)}K_H(DMA) = m_{DMA(eff.)}/p_{DMA} = K_H(DMA) \cdot [1 + K_b(DMA)/m_{OH^-}] \quad (S4)$$

40 where  $^{(eff.)}K_H(DMA)$  is the effective Henry's Law constant of DMA, including the undissociated amine and aminium cation.  $K_H$  is the Henry's Law constant ( $\text{mol kg}^{-1} \text{ atm}^{-1}$ ),  $K_b$  is the base dissociation constant ( $\text{mol kg}^{-1}$ ), the prefix m indicates molality ( $\text{mol kg}^{-1}$ ), and p is the partial pressure (atm).

According to the Eqs. S1-4, the effective Henry's Law constant is a function of pH and temperature. The same is true for TMA and  $\text{NH}_3$ .
